# Supplementary material for: Ovine KRTAP36-2: A New Keratin-Associated Protein Gene Related to Variation in Wool Yield
Source: MDPI journal article supplement (doi:10.3390/genes14112045), 2023-11-06
Supplement: s1 [file s1]

Supplementary Table S1. Ovine EST sequences showing 99% sequence identity to the ORF identified in this study.

| Description                                               | Scientific Name   | Max Score | Total Score | Query Cover | E value  | Percent identity | Acc. Len | GenBank Accession Number |
|-----------------------------------------------------------|-------------------|-----------|-------------|-------------|----------|------------------|----------|--------------------------|
| 010801OFSA032713HT OFSA Ovis aries cDNA 5', mRNA sequence | <i>Ovis aries</i> | 311       | 311         | 100%        | 1.00E-81 | 99               | 516      | GO776873.1               |
| 010709OFSA028031HT OFSA Ovis aries cDNA 5', mRNA sequence | <i>Ovis aries</i> | 311       | 311         | 100%        | 1.00E-81 | 99               | 519      | GO745965.1               |
| 010709OFSA027638HT OFSA Ovis aries cDNA 5', mRNA sequence | <i>Ovis aries</i> | 311       | 311         | 100%        | 1.00E-81 | 99               | 518      | GO748537.1               |
| 000905OASA004179HT OASA Ovis aries cDNA 5', mRNA sequence | <i>Ovis aries</i> | 311       | 311         | 100%        | 1.00E-81 | 99               | 530      | GO734707.1               |
| 001114OFSA012892HT OFSA Ovis aries cDNA 5', mRNA sequence | <i>Ovis aries</i> | 311       | 311         | 100%        | 1.00E-81 | 99               | 343      | GO710657.1               |
| 010704OFSA026838HT OFSA Ovis aries cDNA 5', mRNA sequence | <i>Ovis aries</i> | 311       | 311         | 100%        | 1.00E-81 | 99               | 514      | GO711704.1               |
| 010702OFSA025652HT OFSA Ovis aries cDNA 5', mRNA sequence | <i>Ovis aries</i> | 311       | 311         | 100%        | 1.00E-81 | 99               | 214      | GO679356.1               |
| 001114OFSA012910HT OFSA Ovis aries cDNA 5', mRNA sequence | <i>Ovis aries</i> | 311       | 311         | 100%        | 1.00E-81 | 99               | 330      | GO674524.1               |
| 030729OSPA2029078HT OSPA Ovis aries cDNA, mRNA sequence   | <i>Ovis aries</i> | 311       | 311         | 100%        | 1.00E-81 | 99               | 498      | EE854050.1               |
| 030729OSCA3004013HT OSCA Ovis aries cDNA, mRNA sequence   | <i>Ovis aries</i> | 311       | 311         | 100%        | 1.00E-81 | 99               | 494      | EE849207.1               |
| 030522OSCA3002013HT OSCA Ovis aries cDNA, mRNA sequence   | <i>Ovis aries</i> | 311       | 311         | 100%        | 1.00E-81 | 99               | 453      | EE848242.1               |
| 030729OSCA3023065HT OSCA Ovis aries cDNA, mRNA sequence   | <i>Ovis aries</i> | 311       | 311         | 100%        | 1.00E-81 | 99               | 492      | EE848165.1               |
| 030729OSCA3010040HT OSCA Ovis aries cDNA, mRNA sequence   | <i>Ovis aries</i> | 311       | 311         | 100%        | 1.00E-81 | 99               | 521      | EE848138.1               |
| 010914OSAA043090HT OSAA Ovis aries cDNA, mRNA sequence    | <i>Ovis aries</i> | 311       | 311         | 100%        | 1.00E-81 | 99               | 284      | EE839651.1               |
| 020605OCS411011005HT OCS4 Ovis aries cDNA, mRNA sequence  | <i>Ovis aries</i> | 311       | 311         | 100%        | 1.00E-81 | 99               | 463      | EE755445.1               |
| 020502OCSI1017061HT OCS1 Ovis aries cDNA, mRNA sequence   | <i>Ovis aries</i> | 311       | 311         | 100%        | 1.00E-81 | 99               | 483      | EE753108.1               |
| 020314OCSI1001052HT OCS1 Ovis aries cDNA, mRNA sequence   | <i>Ovis aries</i> | 311       | 311         | 100%        | 1.00E-81 | 99               | 495      | EE751850.1               |
| 020502OCSI1020011HT OCS1 Ovis aries cDNA, mRNA sequence   | <i>Ovis aries</i> | 311       | 311         | 100%        | 1.00E-81 | 99               | 492      | EE751738.1               |
| 020502OCSI1019082HT OCS1 Ovis aries cDNA, mRNA sequence   | <i>Ovis aries</i> | 311       | 311         | 100%        | 1.00E-81 | 99               | 495      | EE751673.1               |
